# Supplementary material for: Structural Investigation of Magnesium Complexes Supported by a Thiopyridyl Scorpionate Ligand
Source: MDPI journal article supplement (doi:10.3390/molecules27144564), 2022-07-18
Supplement: s1 [file s1]

# Structural Investigation of Magnesium Complexes Supported by a Thiopyridyl Scorpionate Ligand

Matthew P. Stevens <sup>1</sup>, Emily Spray <sup>1</sup>, Iñigo J. Vitorica-Yrezabal <sup>2</sup>, Kuldip Singh <sup>1</sup>, Vanessa M. Timmermann <sup>1</sup>, Lia Sotorrios <sup>3,\*</sup> and Fabrizio Ortu <sup>1,\*</sup>

<sup>1</sup> School of Chemistry, University of Leicester, University Road, Leicester LE1 7RH, UK; mps28@leicester.ac.uk (M.P.S.); emily.spray@hotmail.co.uk (E.S.); ks42@leicester.ac.uk (K.S.); vanessa.timmermann@siigroup.com (V.M.T.)

<sup>2</sup> Department of Chemistry, The University of Manchester, Oxford Road, Manchester M13 9PL, UK; inigo.vitorica@manchester.ac.uk

<sup>3</sup> Institute of Chemical Sciences, Heriot-Watt University, Edinburgh EH14 4AS, UK

\* Correspondence: l.sotorrios@hw.ac.uk (L.S.); fabrizio.ortu@leicester.ac.uk (F.O.); Tel.: +44-(0)116-294-4670 (F.O.)

|                               |            |
|-------------------------------|------------|
| <b>S1. NMR data</b>           | <b>S2</b>  |
| <b>S2. IR data</b>            | <b>S10</b> |
| <b>S3. Crystallography</b>    | <b>S12</b> |
| <b>S4. Computational data</b> | <b>S16</b> |

# S1. NMR data

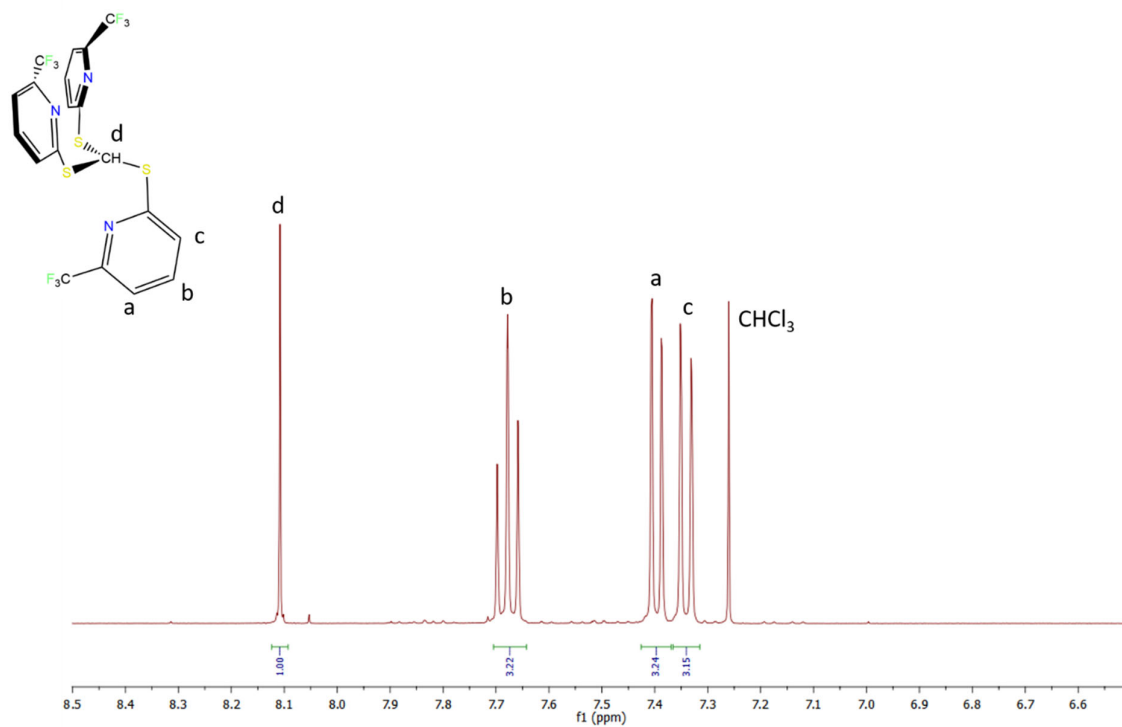

**Figure S1:** <sup>1</sup>H NMR (400 MHz, 298 K, CDCl<sub>3</sub>) spectrum of HTptm<sup>CF3</sup>, with assignment.

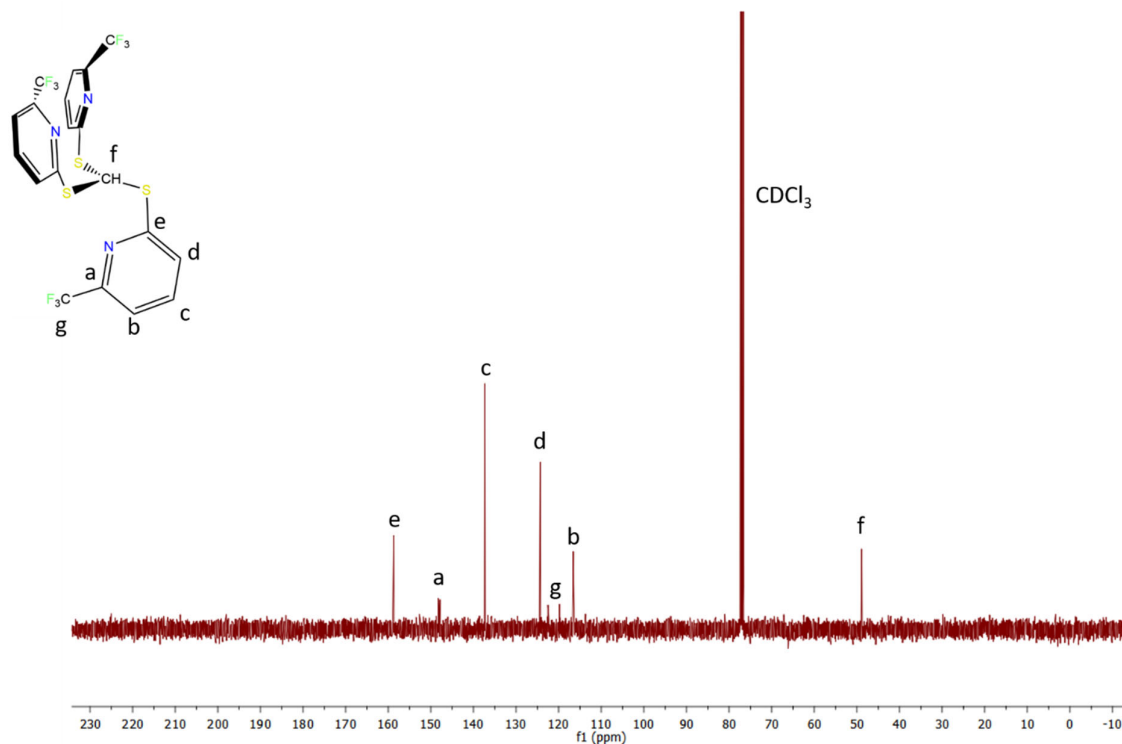

**Figure S2:** <sup>13</sup>C{<sup>1</sup>H} NMR (100 MHz, 298 K, CDCl<sub>3</sub>) spectrum of HTptm<sup>CF3</sup>, with assignment.

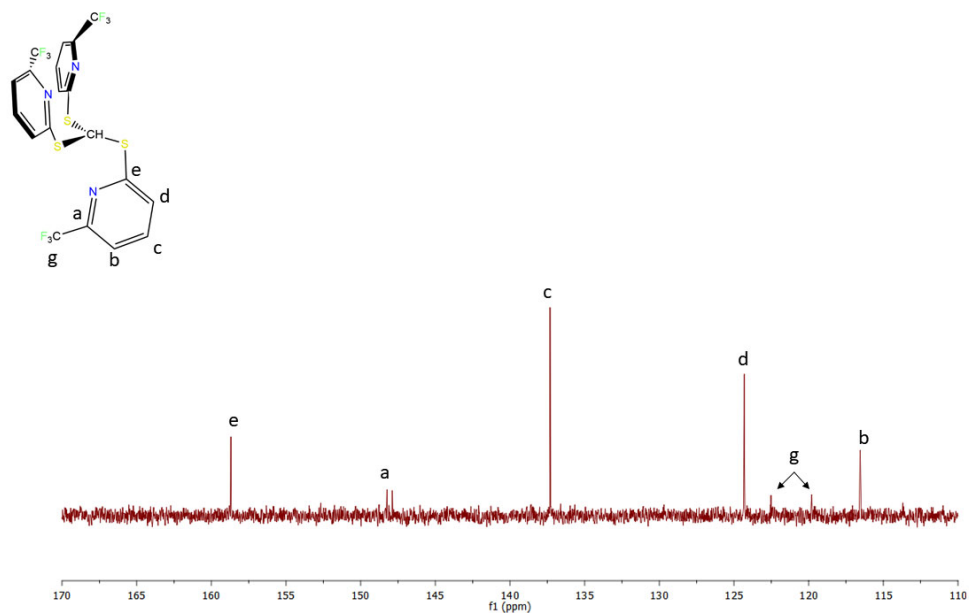

**Figure S3:** <sup>13</sup>C{<sup>1</sup>H} NMR (100 MHz, 298 K, CDCl<sub>3</sub>) spectrum of HTptm<sup>CF3</sup> in the region 110–170 ppm, with assignment.

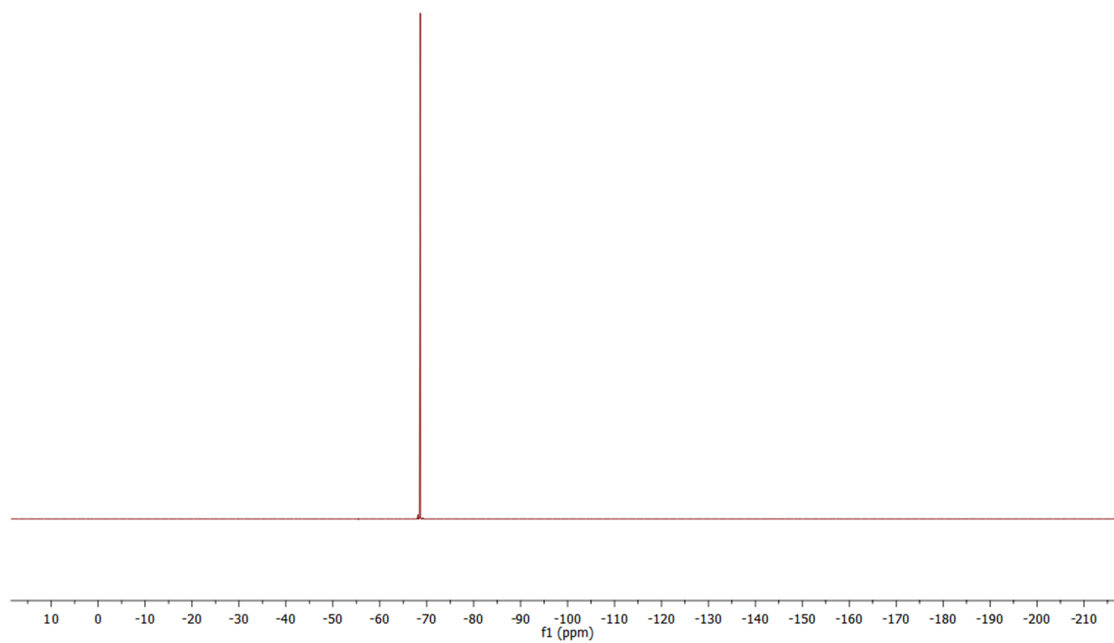

**Figure S4:** <sup>19</sup>F{<sup>1</sup>H} NMR (376 MHz, 298 K, CDCl<sub>3</sub>) spectrum of HTptm<sup>CF3</sup>.

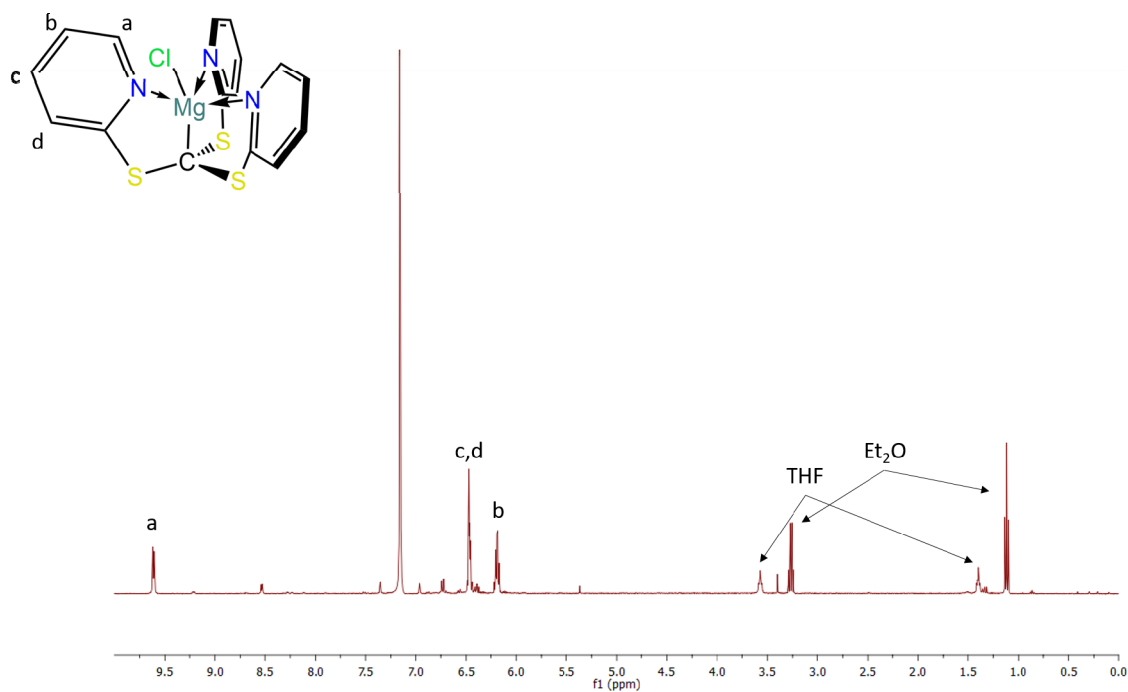

**Figure S5:**  $^1\text{H}$  NMR (400 MHz, 298 K,  $\text{C}_6\text{D}_6$ ) spectrum of **1-Cl**, with assignment.

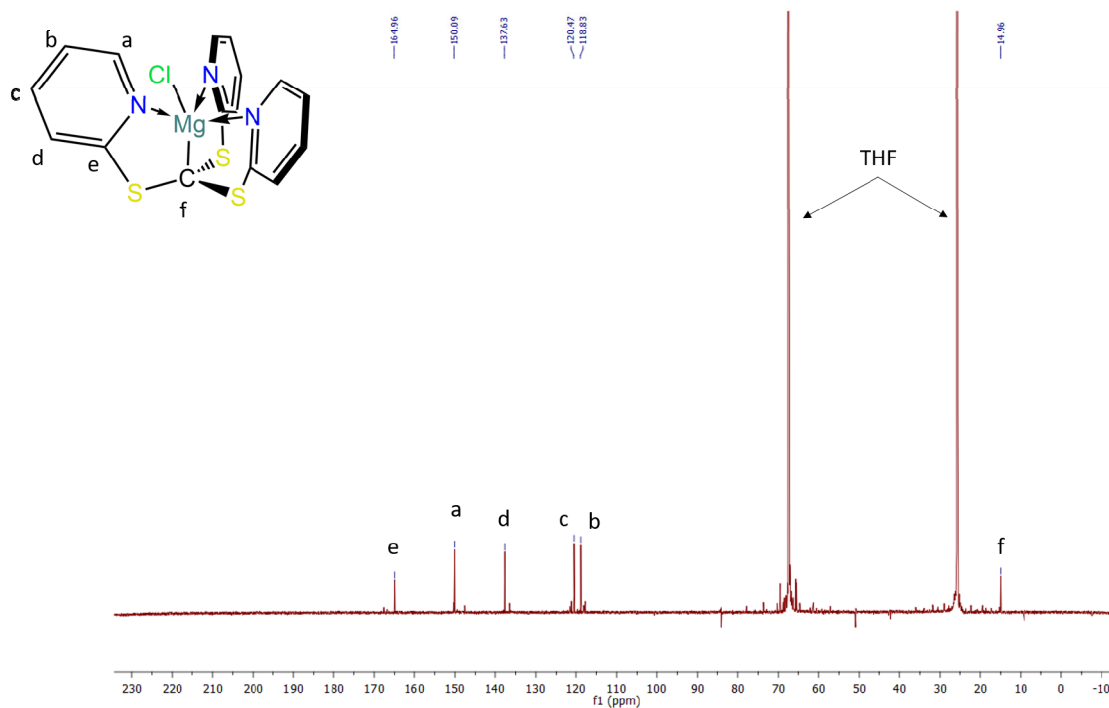

**Figure S6:**  $^{13}\text{C}\{^1\text{H}\}$  NMR (125 MHz, 298 K,  $\text{C}_4\text{D}_8\text{O}$ ) spectrum of **1-Cl**, with assignment.

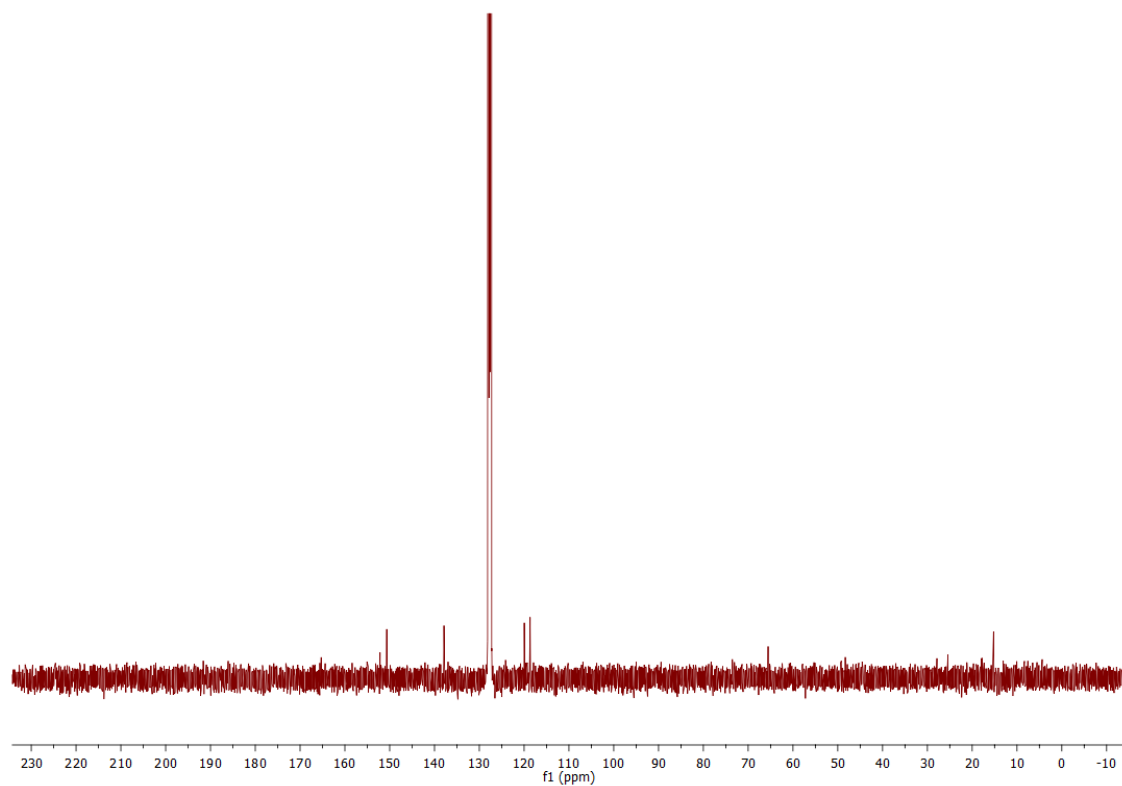

**Figure S7:**  $^{13}\text{C}\{^1\text{H}\}$  NMR (100 MHz, 298 K,  $\text{C}_6\text{D}_6$ ) spectrum of **1-Cl**.

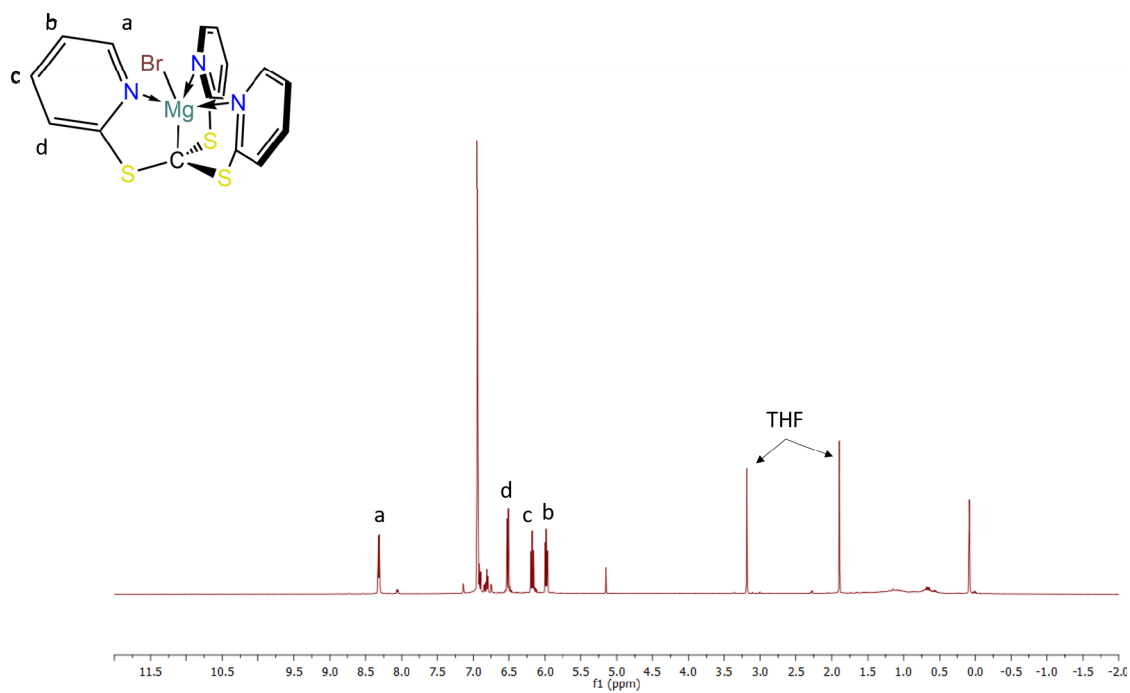

**Figure S8:**  $^1\text{H}$  NMR (400 MHz, 298 K,  $\text{C}_6\text{D}_6$ ) spectrum of **1-Br**, with assignment.

- Supporting Information -

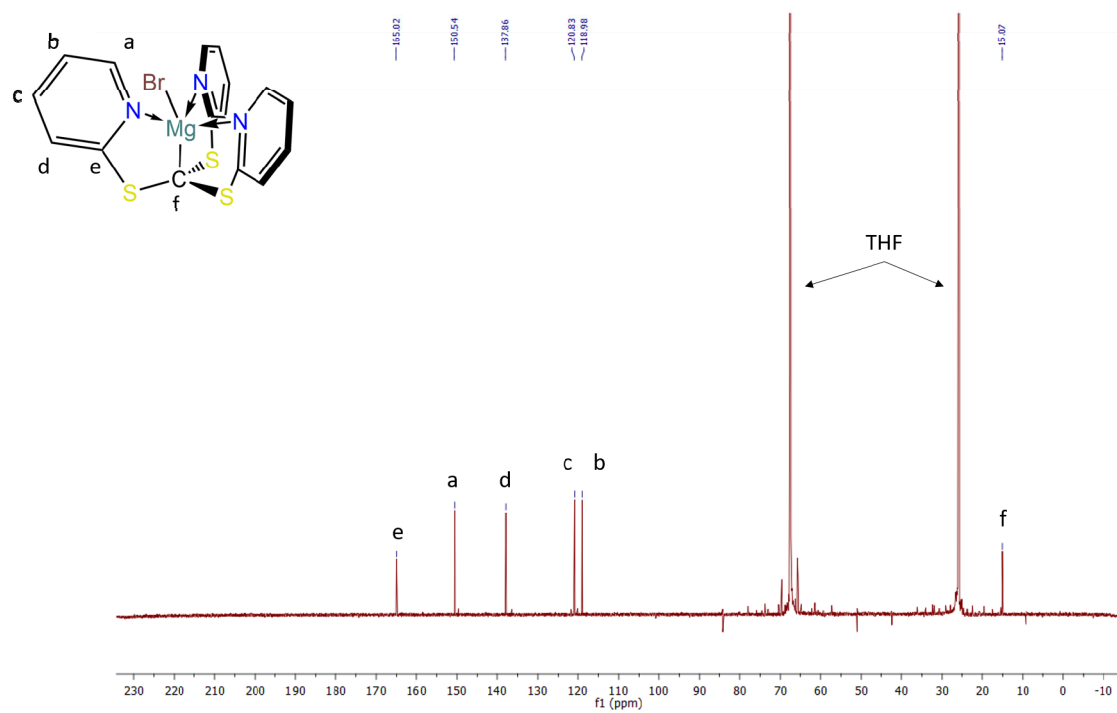

**Figure S9:**  $^{13}\text{C}\{^1\text{H}\}$  NMR (125 MHz, 298 K,  $\text{C}_4\text{D}_8\text{O}$ ) spectrum of **1-Br**, with assignment.

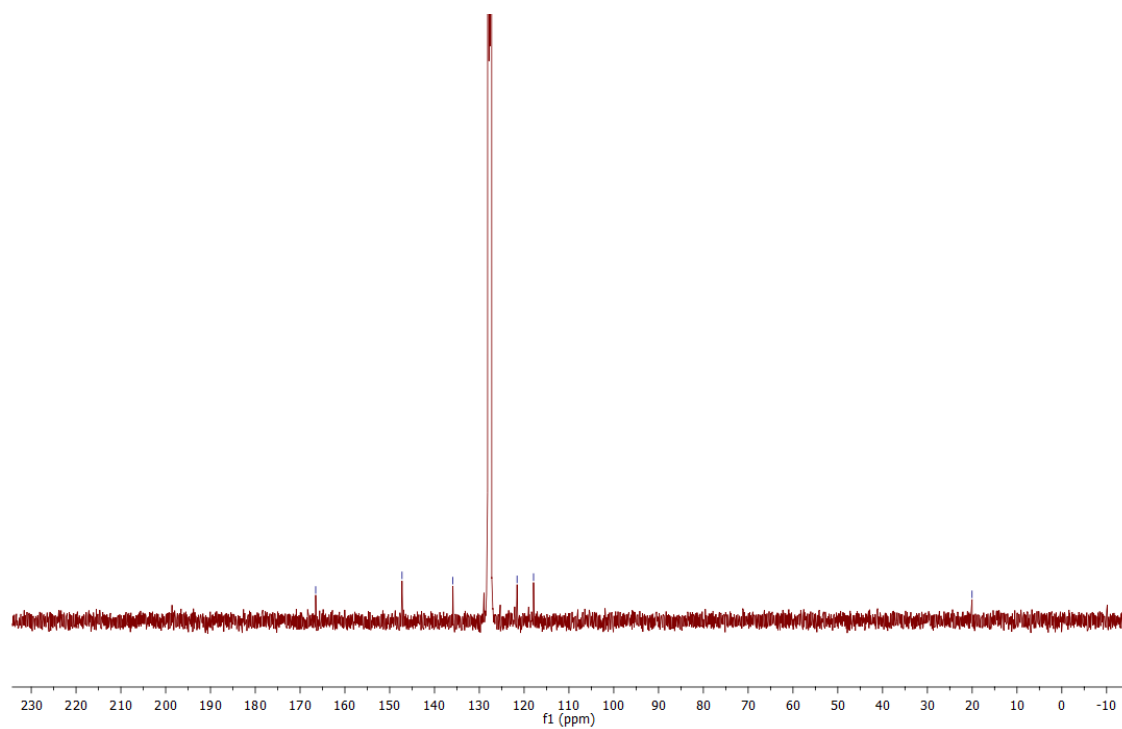

**Figure S10:**  $^{13}\text{C}\{^1\text{H}\}$  NMR (100 MHz, 298 K,  $\text{C}_6\text{D}_6$ ) spectrum of **1-Br**.

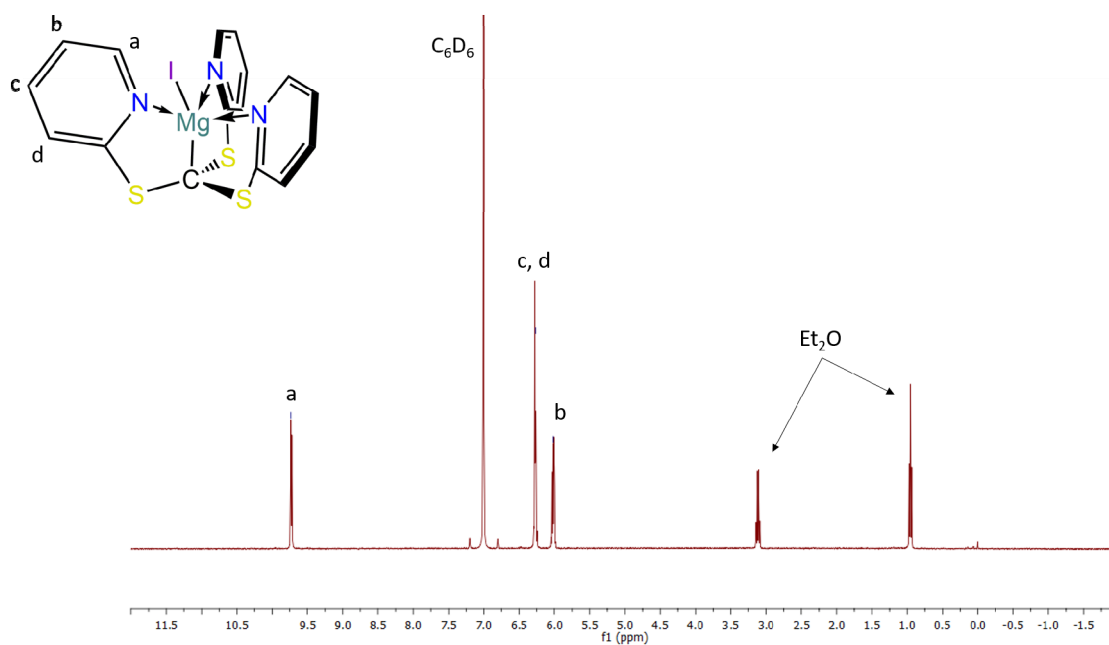

**Figure S11:**  $^1\text{H}$  NMR (400 MHz, 298 K,  $\text{C}_6\text{D}_6$ ) spectrum of **1-I**, with assignment.

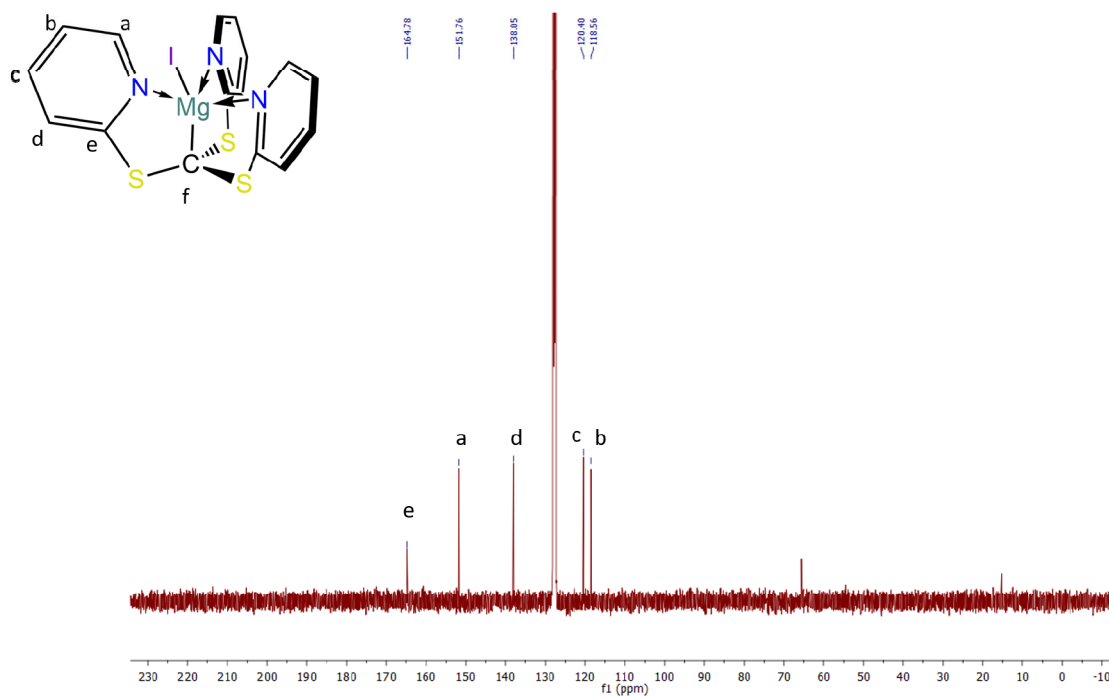

**Figure S12:**  $^{13}\text{C}\{^1\text{H}\}$  NMR (100 MHz, 298 K,  $\text{C}_6\text{D}_6$ ) spectrum of **1-I**, with assignment.

- Supporting Information -

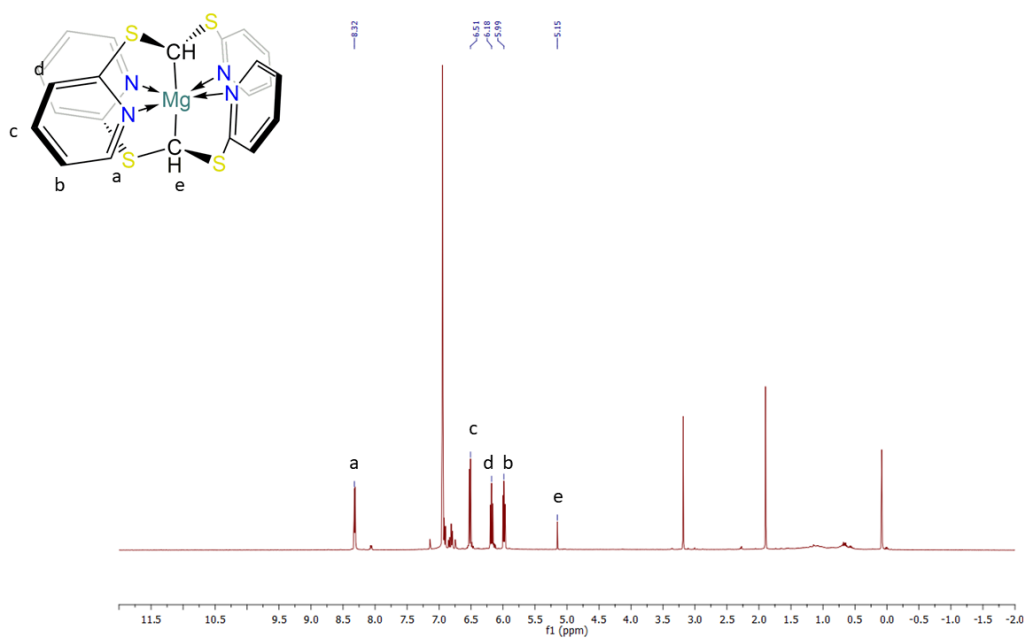

**Figure S13:**  $^1\text{H}$  NMR (400 MHz, 298 K,  $\text{C}_6\text{D}_6$ ) spectrum of **2**, with assignment.

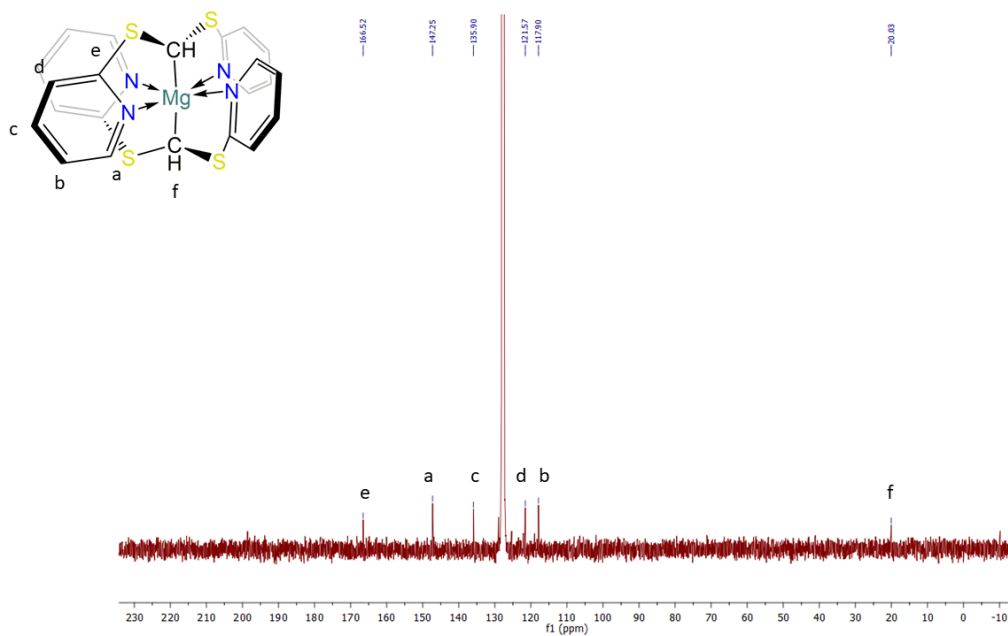

**Figure S14:**  $^{13}\text{C}\{^1\text{H}\}$  NMR (100 MHz, 298 K,  $\text{C}_6\text{D}_6$ ) spectrum of **2**, with assignment.



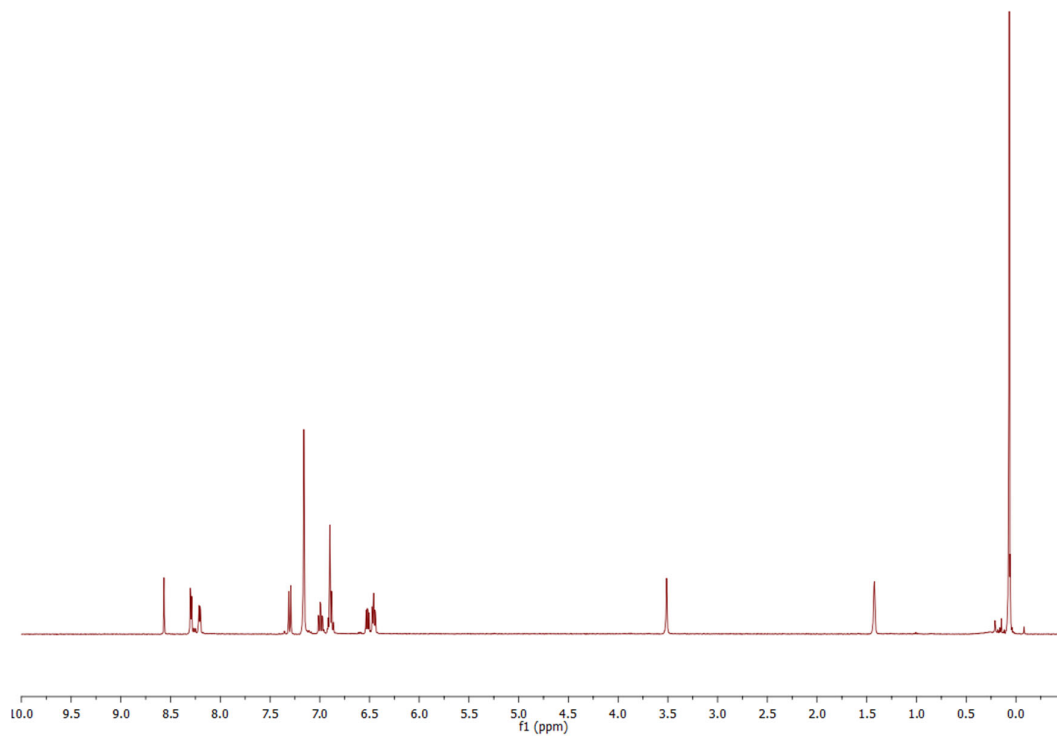

**Figure S15:**  $^1\text{H}$  NMR (400 MHz, 298 K,  $\text{C}_6\text{D}_6/\text{C}_4\text{D}_8\text{O}$ ) spectrum of the NMR scale reaction product of  $\text{KN}''$  and HTptm.

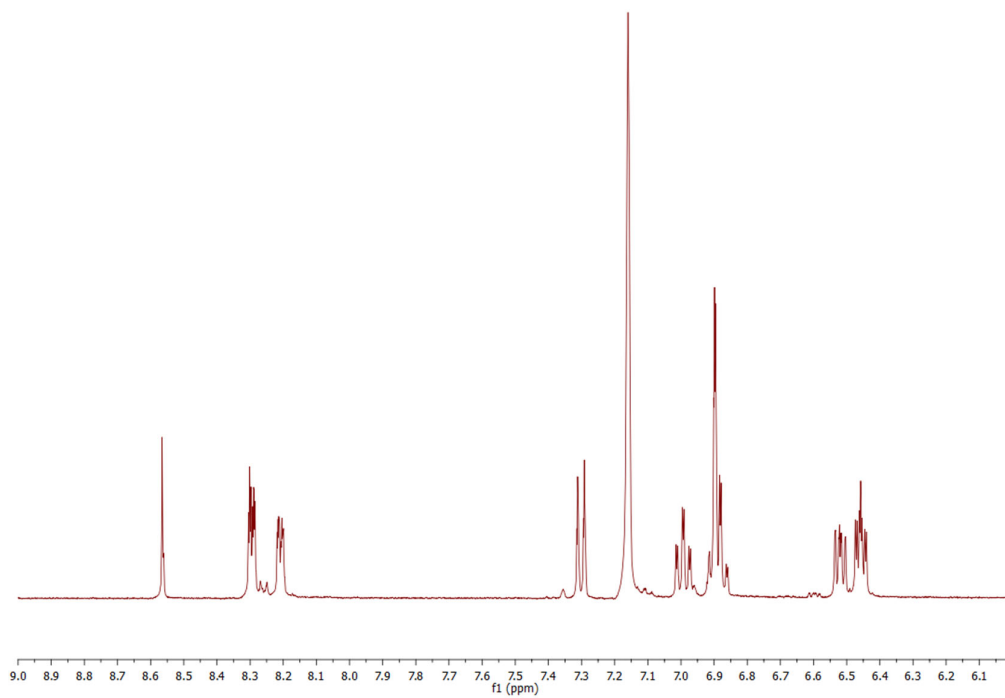

**Figure S16:**  $^1\text{H}$  NMR (400 MHz, 298 K,  $\text{C}_6\text{D}_6/\text{C}_4\text{D}_8\text{O}$ ) spectrum in the region 6.0-9.0 ppm of the NMR scale reaction product of  $\text{KN}''$  and HTptm.

## S2. IR data

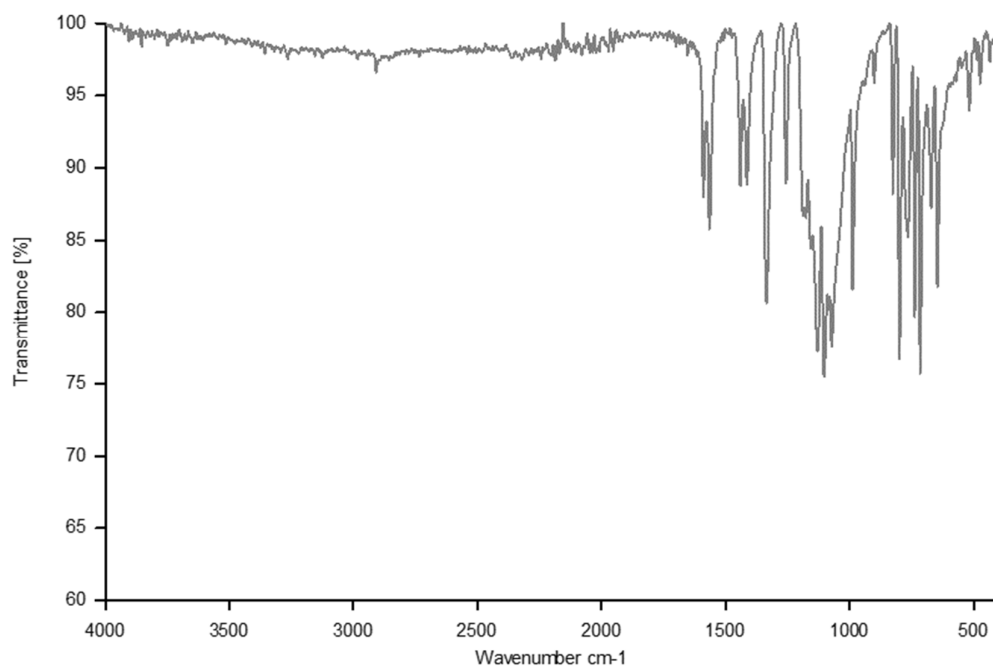

**Figure S17:** FTIR spectrum of HTptm<sup>CF<sub>3</sub></sup>.

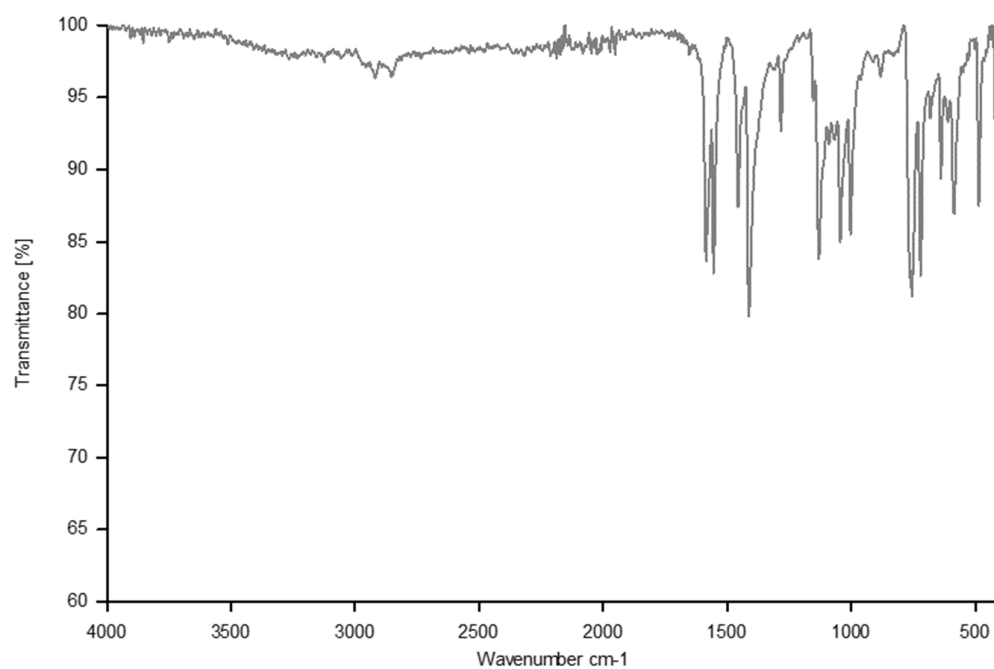

**Figure S18:** FTIR spectrum of 1-Cl.

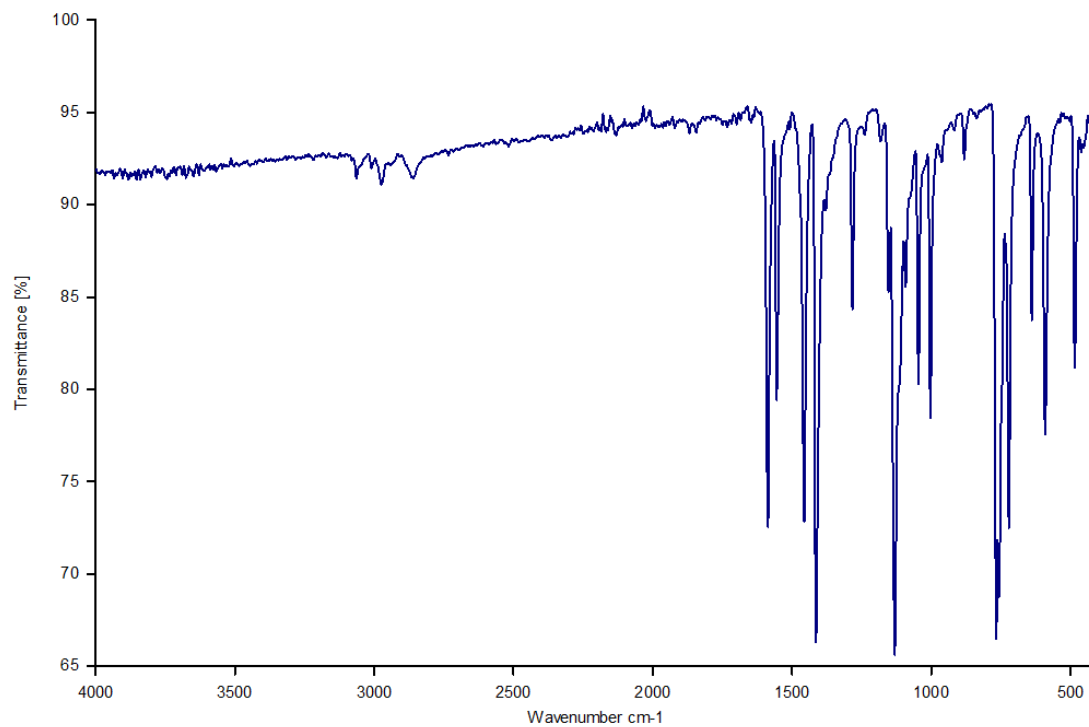

**Figure S19:** FTIR spectrum of **1-Br**.

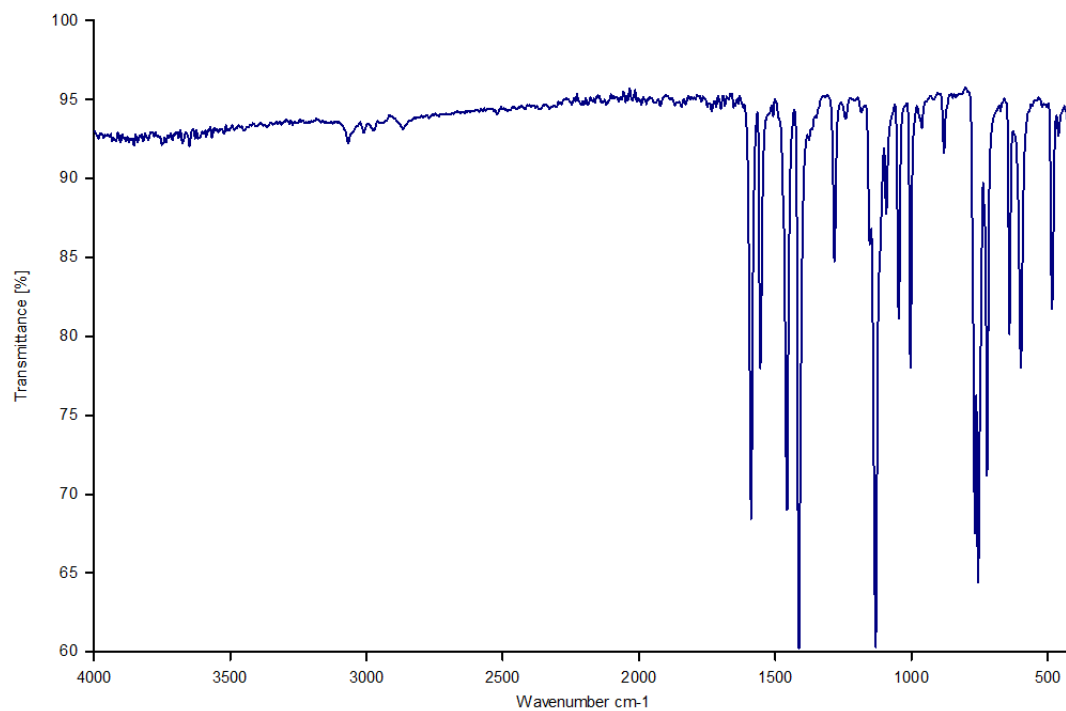

**Figure S20:** FTIR spectrum of **1-I**.

### S3. Crystallography

**Table S1:** Crystallographic data for **1-X**

<sup>a</sup>Conventional  $R = \Sigma||Fo| - |Fc||/\Sigma|Fo|$ ;  $Rw = [\Sigma w(Fo^2 - Fc^2)^2/\Sigma w(Fo^2)^2]^{1/2}$ ;  $S = [\Sigma w(Fo^2 - Fc^2)^2/\text{no. data} - \text{no. params})]^{1/2}$  for all data.

|                                                                          | <b>1-Cl</b>                                                                                          | <b>1-Br</b>                                                                                             | <b>1-I</b>                                                                                         |
|--------------------------------------------------------------------------|------------------------------------------------------------------------------------------------------|---------------------------------------------------------------------------------------------------------|----------------------------------------------------------------------------------------------------|
| Formula                                                                  | C <sub>16</sub> H <sub>12</sub> ClMgN <sub>3</sub> S <sub>3</sub> ,<br>C <sub>3</sub> H <sub>3</sub> | 2(C <sub>16</sub> H <sub>12</sub> BrMgN <sub>3</sub> S <sub>3</sub> ),<br>C <sub>7</sub> H <sub>8</sub> | 1.5(C <sub>32</sub> H <sub>24</sub> I <sub>2</sub> Mg <sub>2</sub> N <sub>6</sub> S <sub>6</sub> ) |
| Formula weight                                                           | 441.28                                                                                               | 985.50                                                                                                  | 1481.03                                                                                            |
| Crystal size, mm                                                         | 0.03 × 0.06 × 0.12                                                                                   | 0.05 × 0.08 × 0.25                                                                                      | 0.04 × 0.09 × 0.49                                                                                 |
| Crystal system                                                           | monoclinic                                                                                           | triclinic                                                                                               | orthorhombic                                                                                       |
| Space group                                                              | P2 <sub>1</sub> /c                                                                                   | P-1                                                                                                     | Pbcn                                                                                               |
| a, Å                                                                     | 12.5335(3)                                                                                           | 9.7481(6)                                                                                               | 9.7312(6)                                                                                          |
| b, Å                                                                     | 9.6427(3)                                                                                            | 14.6381(10)                                                                                             | 16.7573(9)                                                                                         |
| c, Å                                                                     | 16.7854(4)                                                                                           | 16.5395(9)                                                                                              | 34.9877(19)                                                                                        |
| α, °                                                                     | 90                                                                                                   | 109.917(6)                                                                                              | 90                                                                                                 |
| β, °                                                                     | 107.957(3)                                                                                           | 91.018(5)                                                                                               | 90                                                                                                 |
| γ, °                                                                     | 90                                                                                                   | 107.003(6)                                                                                              | 90                                                                                                 |
| V, Å <sup>3</sup>                                                        | 1929.81(9)                                                                                           | 2103.8(3)                                                                                               | 5705.4(6)                                                                                          |
| Z                                                                        | 4                                                                                                    | 2                                                                                                       | 4                                                                                                  |
| ρ <sub>calc</sub> , g cm <sup>3</sup>                                    | 1.519                                                                                                | 1.556                                                                                                   | 1.724                                                                                              |
| μ, mm <sup>-1</sup>                                                      | 5.181                                                                                                | 2.292                                                                                                   | 2.049                                                                                              |
| F(000)                                                                   | 908                                                                                                  | 996                                                                                                     | 2904                                                                                               |
| No. of reflections<br>(unique)                                           | 3987 (3987)                                                                                          | 14556 (7618)                                                                                            | 38213 (5225)                                                                                       |
| S <sup>a</sup>                                                           | 1.22                                                                                                 | 1.03                                                                                                    | 1.05                                                                                               |
| R <sub>1</sub> (wR <sub>2</sub> ) (F <sup>2</sup> > 2σ(F <sup>2</sup> )) | 0.0533 (0.1774)                                                                                      | 0.0895 (0.2455)                                                                                         | 0.0758 (0.1970)                                                                                    |
| R <sub>int</sub>                                                         | 0.042                                                                                                | 0.128                                                                                                   | 0.141                                                                                              |
| Min./max. diff map, Å <sup>-3</sup>                                      | -0.62, 0.89                                                                                          | -0.69, 0.88                                                                                             | -1.24, 0.80                                                                                        |

**Table S2:** Crystallographic data for HTptm<sup>CF3</sup>, **1-I•THF** and **2**

<sup>a</sup>Conventional  $R = \Sigma||Fo| - |Fc||/\Sigma|Fo|$ ;  $Rw = [\Sigma w(Fo^2 - Fc^2)^2/\Sigma w(Fo^2)^2]^{1/2}$ ;  $S = [\Sigma w(Fo^2 - Fc^2)^2/\text{no. data} - \text{no. params})]^{1/2}$  for all data.

|                                                                          | HTptm <sup>CF3</sup>                                                         | <b>1-I•THF</b>                                                    | <b>2</b>                                                                                                   |
|--------------------------------------------------------------------------|------------------------------------------------------------------------------|-------------------------------------------------------------------|------------------------------------------------------------------------------------------------------------|
| Formula                                                                  | C <sub>19</sub> H <sub>10</sub> F <sub>9</sub> N <sub>3</sub> S <sub>3</sub> | C <sub>20</sub> H <sub>20</sub> IMgN <sub>3</sub> OS <sub>3</sub> | C <sub>22</sub> H <sub>18</sub> MgN <sub>4</sub> S <sub>4</sub> ,<br>0.5(C <sub>12</sub> H <sub>12</sub> ) |
| Formula weight                                                           | 547.48                                                                       | 565.78                                                            | 569.06                                                                                                     |
| Crystal size, mm                                                         | 0.12 x 0.27 x<br>0.31                                                        | 0.20 × 0.36 × 0.49                                                | 0.22 × 0.31 × 0.40                                                                                         |
| Crystal system                                                           | monoclinic                                                                   | monoclinic                                                        | triclinic                                                                                                  |
| Space group                                                              | P2 <sub>1</sub> /c                                                           | P2 <sub>1</sub> /n                                                | P-1                                                                                                        |
| a, Å                                                                     | 8.0956(7)                                                                    | 10.0031(9)                                                        | 8.8749(12)                                                                                                 |
| b, Å                                                                     | 14.0932(12)                                                                  | 14.2808(14)                                                       | 9.8170(14)                                                                                                 |
| c, Å                                                                     | 19.8006(14)                                                                  | 16.5175(16)                                                       | 9.9316(13)                                                                                                 |
| α, °                                                                     | 90                                                                           | 90                                                                | 106.175(12)                                                                                                |
| β, °                                                                     | 95.213(7)                                                                    | 89.941(9)                                                         | 115.598(13)                                                                                                |
| γ, °                                                                     | 90                                                                           | 90                                                                | 95.669(12)                                                                                                 |
| V, Å <sup>3</sup>                                                        | 2249.8(3)                                                                    | 2359.6(4)                                                         | 725.1(2)                                                                                                   |
| Z                                                                        | 4                                                                            | 4                                                                 | 1                                                                                                          |
| ρ <sub>calc</sub> , g cm <sup>3</sup>                                    | 1.616                                                                        | 1.593                                                             | 1.303                                                                                                      |
| μ, mm <sup>-1</sup>                                                      | 0.417                                                                        | 1.666                                                             | 0.374                                                                                                      |
| F(000)                                                                   | 1096                                                                         | 1128                                                              | 296                                                                                                        |
| No. of reflections (unique)                                              | 15077 (4117)                                                                 | 4145 (4145)                                                       | 4879 (2540)                                                                                                |
| S <sup>a</sup>                                                           | 1.10                                                                         | 1.04                                                              | 1.11                                                                                                       |
| R <sub>1</sub> (wR <sub>2</sub> ) (F <sup>2</sup> > 2σ(F <sup>2</sup> )) | 0.0810 (0.1504)                                                              | 0.1044 (0.2728)                                                   | 0.0867 (0.2389)                                                                                            |
| R <sub>int</sub>                                                         | 0.094                                                                        | 0.151                                                             | 0.041                                                                                                      |
| Min./max. diff map, Å <sup>-3</sup>                                      | -0.27, 0.29                                                                  | -1.41, 2.20                                                       | -0.40, 0.78                                                                                                |

**Table S3:** Crystallographic data for  $(\text{C}_5\text{H}_4\text{N-S})_2\text{C}=\text{C}(\text{C}_5\text{H}_4\text{N-S})_2$ .

<sup>a</sup>Conventional  $R = \Sigma||Fo| - |Fc||/\Sigma|Fo|$ ;  $R_w = [\Sigma w(Fo^2 - Fc^2)^2/\Sigma w(Fo^2)^2]^{1/2}$ ;  $S = [\Sigma w(Fo^2 - Fc^2)^2/\text{no. data} - \text{no. params}]^{1/2}$  for all data.

|                                          | <b><math>(\text{C}_5\text{H}_4\text{N-S})_2\text{C}=\text{C}(\text{C}_5\text{H}_4\text{N-S})_2</math></b> |
|------------------------------------------|-----------------------------------------------------------------------------------------------------------|
| Formula                                  | $\text{C}_{22}\text{H}_{16}\text{N}_4\text{S}_4$                                                          |
| Formula weight                           | 464.63                                                                                                    |
| Crystal size, mm                         | $0.03 \times 0.10 \times 0.12$                                                                            |
| Crystal system                           | monoclinic                                                                                                |
| Space group                              | $P2_1/c$                                                                                                  |
| a, Å                                     | 9.9386(9)                                                                                                 |
| b, Å                                     | 10.3040(7)                                                                                                |
| c, Å                                     | 11.3175(10)                                                                                               |
| $\alpha$ , °                             | 90                                                                                                        |
| $\beta$ , °                              | 114.517(10)                                                                                               |
| $\gamma$ , °                             | 90                                                                                                        |
| V, Å <sup>3</sup>                        | 1054.51(2)                                                                                                |
| Z                                        | 2                                                                                                         |
| $\rho_{\text{calc}}$ , g cm <sup>3</sup> | 1.463                                                                                                     |
| $\mu$ , mm <sup>-1</sup>                 | 0.468                                                                                                     |
| F(000)                                   | 480                                                                                                       |
| No. of reflections (unique)              | 8879 (2565)                                                                                               |
| S <sup>a</sup>                           | 1.08                                                                                                      |
| $R_1(wR_2)$ ( $F^2 > 2\sigma(F^2)$ )     | 0.0661 (0.1380)                                                                                           |
| $R_{\text{int}}$                         | 0.083                                                                                                     |
| Min./max. diff map, Å <sup>-3</sup>      | -0.35, 0.45                                                                                               |

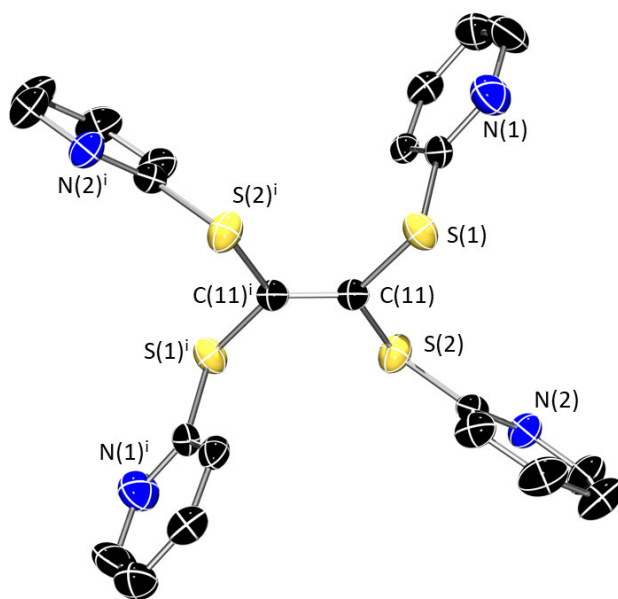

**Figure S21:** Crystal structure of **3**. Ellipsoids are set at 50% probability level and hydrogens omitted for clarity. The asymmetric unit contains half a molecule; the full molecule has been reproduced here. Symmetry operation used to generate equivalent atoms:  $i = 1-x, 1-y, -z$ . C: black; N: blue; S: yellow.

## S4. Computational data

### *Computed Structures (A) and Energies (a. u.)*

#### **K(Tptm)**

BP86 energy = -1111.77927724  
Enthalpy 0K = -1111.416953  
Enthalpy 298K = -1111.384929  
Free energy 298K = -1111.488091  
Low freq. = 10.5471 cm<sup>-1</sup>

|   |          |          |          |
|---|----------|----------|----------|
| C | -1.84675 | -0.28620 | 0.98552  |
| K | 0.53346  | 0.17151  | -0.49062 |
| S | -1.45088 | -1.08964 | 2.56875  |
| S | -2.98622 | -1.35979 | 0.06557  |
| S | -2.70476 | 1.26899  | 1.35820  |
| C | -2.51910 | -1.39498 | -1.66901 |
| N | -1.45373 | -0.73462 | -2.17441 |
| C | -1.24111 | -0.81763 | -3.51069 |
| C | -3.38964 | -2.16358 | -2.49043 |
| C | -3.14158 | -2.24072 | -3.85794 |
| C | -2.03940 | -1.54400 | -4.39628 |
| H | -0.37048 | -0.26026 | -3.88478 |
| H | -4.24306 | -2.67975 | -2.03840 |
| H | -3.79972 | -2.83128 | -4.50452 |
| H | -1.81243 | -1.56400 | -5.46582 |
| H | 2.04006  | -3.87989 | 4.50680  |
| C | 1.72956  | -3.32137 | 3.61710  |
| H | 3.47613  | -3.86162 | 2.40467  |
| C | 2.53370  | -3.30937 | 2.45712  |
| C | 2.07790  | -2.56863 | 1.36466  |
| C | 0.52668  | -2.62175 | 3.61461  |
| H | 2.66829  | -2.53132 | 0.43811  |
| H | -0.13222 | -2.62271 | 4.48923  |
| N | 0.91999  | -1.86376 | 1.34188  |
| C | 0.14582  | -1.89814 | 2.44973  |
| H | -1.79520 | 6.05054  | 1.51948  |
| C | -1.37424 | 5.06639  | 1.28663  |
| H | 0.61859  | 5.80737  | 0.74910  |
| C | -0.03687 | 4.93860  | 0.85629  |
| C | 0.42871  | 3.65374  | 0.57090  |
| C | -2.15538 | 3.92190  | 1.41879  |
| H | 1.46295  | 3.50500  | 0.22985  |
| H | -3.19378 | 3.97982  | 1.76157  |
| N | -0.31312 | 2.52438  | 0.68147  |
| C | -1.58958 | 2.65509  | 1.10553  |
| H | 2.96204  | -1.14280 | -3.58376 |
| C | 3.17611  | -0.34244 | -2.86749 |
| C | 2.75248  | 0.97313  | -3.13226 |
| H | 2.21213  | 1.20466  | -4.05598 |
| C | 3.05117  | 1.99228  | -2.21186 |
| H | 2.73999  | 3.02274  | -2.41367 |
| C | 3.76505  | 1.69559  | -1.03645 |

|   |         |          |          |
|---|---------|----------|----------|
| H | 4.00727 | 2.49900  | -0.33094 |
| C | 4.19743 | 0.38188  | -0.75613 |
| C | 3.89038 | -0.63115 | -1.69303 |
| H | 4.23308 | -1.65602 | -1.50730 |
| C | 4.96984 | 0.06075  | 0.50589  |
| H | 5.21368 | 0.97307  | 1.07306  |
| H | 5.91618 | -0.45782 | 0.27319  |
| H | 4.39157 | -0.60472 | 1.17193  |

#### **HN(SiMe<sub>3</sub>)<sub>2</sub>**

BP86 energy = -302.752809504  
Enthalpy 0K = -302.520538  
Enthalpy 298K = -302.502084  
Free energy 298K = -302.565282  
Low freq. = 20.5758 cm<sup>-1</sup>

|    |          |          |          |
|----|----------|----------|----------|
| H  | -2.76683 | -0.22464 | 2.32229  |
| H  | 2.78768  | -0.24528 | 2.30964  |
| H  | -2.11493 | -2.46367 | 0.18074  |
| C  | -2.81723 | 0.49199  | 1.48397  |
| C  | 2.80929  | -0.79244 | 1.35072  |
| C  | -2.13772 | -1.69575 | -0.61109 |
| H  | 2.23625  | 2.37929  | 0.60923  |
| H  | 2.53817  | -1.84220 | 1.55309  |
| N  | 0.00244  | -0.03384 | 0.77605  |
| H  | -3.86099 | 0.50569  | 1.12576  |
| H  | -2.58398 | 1.49546  | 1.87857  |
| H  | -3.15903 | -1.66872 | -1.03056 |
| Si | -1.62902 | 0.00522  | 0.07791  |
| H  | 3.85121  | -0.77442 | 0.98700  |
| H  | -1.45379 | -2.02152 | -1.41306 |
| Si | 1.63180  | -0.01071 | 0.07492  |
| C  | 2.22081  | 1.76142  | -0.30499 |
| H  | 3.23948  | 1.76359  | -0.73191 |
| H  | 1.55007  | 2.25374  | -1.02950 |
| C  | -1.72503 | 1.28809  | -1.32485 |
| C  | 1.64440  | -1.02151 | -1.53605 |
| H  | 1.36618  | -2.07152 | -1.34618 |
| H  | -2.73597 | 1.31081  | -1.76823 |
| H  | -1.49362 | 2.29903  | -0.94959 |
| H  | -1.01519 | 1.05879  | -2.13826 |
| H  | 2.64960  | -1.01183 | -1.99232 |
| H  | 0.94212  | -0.61299 | -2.28289 |
| H  | 0.00036  | -0.00670 | 1.79814  |

#### **K[N(SiMe<sub>3</sub>)<sub>2</sub>]**

BP86 energy = -602.062506636  
Enthalpy 0K = -601.716589  
Enthalpy 298K = -601.688171  
Free energy 298K = -601.780640  
Low freq. = 5.2267 cm<sup>-1</sup>



*- Supporting Information -*

|    |          |          |          |
|----|----------|----------|----------|
| K  | -0.82529 | 0.66218  | -0.06430 |
| H  | 0.90092  | 2.99138  | -0.95139 |
| H  | -0.43983 | -2.29760 | 0.86441  |
| H  | 3.23537  | 1.52719  | -2.46908 |
| C  | 1.52989  | 2.94710  | -0.03912 |
| C  | 0.16733  | -2.57489 | -0.02051 |
| C  | 3.81265  | 1.55303  | -1.52803 |
| H  | 2.23532  | -2.09226 | 2.49442  |
| H  | -0.39760 | -2.31604 | -0.93837 |
| N  | 1.63297  | -0.00927 | -0.01074 |
| H  | 2.13649  | 3.87008  | -0.03770 |
| H  | 0.87166  | 3.00739  | 0.85124  |
| H  | 4.38209  | 2.50000  | -1.50222 |
| Si | 2.65660  | 1.36207  | -0.00647 |
| H  | 0.26479  | -3.67498 | -0.00694 |
| H  | 4.54195  | 0.72509  | -1.56917 |
| Si | 1.90330  | -1.69797 | 0.01177  |
| C  | 2.77294  | -2.39163 | 1.57745  |
| H  | 2.83715  | -3.49501 | 1.56355  |
| H  | 3.80125  | -1.99777 | 1.65826  |
| C  | 3.76360  | 1.58113  | 1.54744  |
| C  | 2.84589  | -2.42248 | -1.49659 |
| H  | 2.35361  | -2.14016 | -2.44389 |
| H  | 4.33111  | 2.52931  | 1.52407  |
| H  | 3.15701  | 1.56871  | 2.47013  |
| H  | 4.49348  | 0.75630  | 1.62494  |
| H  | 2.90672  | -3.52547 | -1.45830 |
| H  | 3.87789  | -2.03188 | -1.53534 |
| H  | -4.38376 | -2.79483 | 0.79611  |
| H  | -2.82795 | -2.73881 | -0.06285 |
| H  | -3.82736 | -0.73622 | 2.15032  |
| C  | -3.86554 | -2.35530 | -0.07172 |
| H  | -4.34781 | -2.73127 | -0.98840 |
| C  | -3.84581 | -0.15823 | 1.21905  |
| C  | -3.88679 | -0.84290 | -0.01747 |
| H  | -3.84206 | 1.75286  | 2.24537  |
| C  | -3.85311 | 1.24714  | 1.27381  |
| C  | -3.92988 | -0.07025 | -1.20039 |
| H  | -3.97863 | -0.57919 | -2.17011 |
| C  | -3.89897 | 2.00189  | 0.08662  |
| C  | -3.93738 | 1.33583  | -1.15235 |
| H  | -3.92618 | 3.09565  | 0.12756  |
| H  | -3.99342 | 1.91081  | -2.08301 |

### HTptm

BP86 energy = -812.445497420  
 Enthalpy 0K = -812.195852  
 Enthalpy 298K = -812.174693  
 Free energy 298K = -812.248951  
 Low freq. = 16.7175 cm<sup>-1</sup>

|   |          |         |         |
|---|----------|---------|---------|
| C | -0.01357 | 0.12498 | 0.11490 |
|---|----------|---------|---------|

|   |          |          |          |
|---|----------|----------|----------|
| S | 0.09984  | 1.82639  | -0.57500 |
| S | -1.23270 | -0.05755 | 1.47794  |
| S | -0.21102 | -1.09783 | -1.25564 |
| C | -2.75236 | 0.43015  | 0.66717  |
| N | -2.68647 | 0.88614  | -0.59523 |
| C | -3.84215 | 1.25327  | -1.19117 |
| C | -3.96154 | 0.31765  | 1.39201  |
| C | -5.14383 | 0.70755  | 0.75849  |
| C | -5.09171 | 1.18627  | -0.56426 |
| H | -3.74691 | 1.61802  | -2.22124 |
| H | -3.96297 | -0.06678 | 2.41682  |
| H | -6.09929 | 0.63569  | 1.28866  |
| H | -5.99625 | 1.49793  | -1.09397 |
| H | 4.04612  | 4.75373  | -0.61058 |
| C | 3.63568  | 3.78711  | -0.29983 |
| H | 5.47370  | 3.07912  | 0.65202  |
| C | 4.43193  | 2.86144  | 0.40055  |
| C | 3.85006  | 1.64309  | 0.76893  |
| C | 2.31103  | 3.46115  | -0.59960 |
| H | 4.42660  | 0.88608  | 1.31507  |
| H | 1.66331  | 4.15481  | -1.14562 |
| N | 2.57101  | 1.31159  | 0.48997  |
| C | 1.82309  | 2.20147  | -0.17869 |
| H | 1.44249  | -5.72192 | -1.39362 |
| C | 1.37671  | -4.79581 | -0.81273 |
| H | 2.49420  | -5.55159 | 0.90926  |
| C | 1.96273  | -4.70579 | 0.46402  |
| C | 1.84322  | -3.49524 | 1.15635  |
| C | 0.70511  | -3.68882 | -1.33564 |
| H | 2.28094  | -3.37511 | 2.15546  |
| H | 0.23527  | -3.72145 | -2.32401 |
| N | 1.19918  | -2.41176 | 0.67026  |
| C | 0.64817  | -2.51265 | -0.55011 |
| H | 0.96361  | -0.08139 | 0.59755  |

### (C<sub>5</sub>H<sub>4</sub>N-S)<sub>2</sub>C=C(C<sub>5</sub>H<sub>4</sub>N-S)<sub>2</sub>

BP86 energy = -1107.83579906  
 Enthalpy 0K = -1107.513733  
 Enthalpy 298K = -1107.485033  
 Free energy 298K = -1107.577704  
 Low freq. = 14.7749 cm<sup>-1</sup>

|   |          |          |          |
|---|----------|----------|----------|
| C | -0.63825 | -0.31704 | 0.08385  |
| S | -1.69759 | -0.16142 | -1.35482 |
| S | -1.42851 | -0.48084 | 1.69462  |
| H | -5.77544 | -2.74074 | -2.30061 |
| C | -4.83792 | -2.69078 | -1.73695 |
| H | -5.10052 | -4.61156 | -0.72826 |
| C | -4.46911 | -3.72873 | -0.86298 |
| C | -3.26412 | -3.60213 | -0.15854 |
| C | -3.99943 | -1.57929 | -1.86754 |
| H | -2.93772 | -4.38164 | 0.54092  |

- Supporting Information -

|   |          |          |          |
|---|----------|----------|----------|
| H | -4.26222 | -0.73880 | -2.51774 |
| N | -2.42847 | -2.54977 | -0.28671 |
| C | -2.79984 | -1.56683 | -1.12215 |
| H | -0.65390 | 4.47937  | 1.79337  |
| C | -1.02723 | 3.57729  | 2.29057  |
| H | -1.67106 | 4.60343  | 4.10980  |
| C | -1.59051 | 3.65259  | 3.57501  |
| C | -2.05434 | 2.46438  | 4.15861  |
| C | -0.94059 | 2.33967  | 1.63872  |
| H | -2.50719 | 2.46956  | 5.15837  |
| H | -0.51137 | 2.25242  | 0.63389  |
| N | -1.98329 | 1.26052  | 3.55727  |
| C | -1.43287 | 1.21254  | 2.33024  |
| H | -0.56742 | 4.13432  | -1.63081 |
| H | 0.52032  | 4.94572  | -3.74913 |
| C | 0.13437  | 3.49551  | -2.18151 |
| C | 0.73860  | 3.94751  | -3.35960 |
| N | 0.35121  | 2.27325  | -1.64410 |
| C | 1.62994  | 3.07965  | -4.01787 |
| H | 6.14177  | -2.02954 | 2.30411  |
| H | 4.32698  | -0.31419 | 2.62735  |
| C | 5.23157  | -2.06493 | 1.69640  |
| H | 2.13165  | 3.38820  | -4.94109 |
| C | 4.22633  | -1.11190 | 1.88460  |
| C | 1.20237  | 1.45679  | -2.28488 |
| C | 1.87565  | 1.81597  | -3.47696 |
| C | 5.06254  | -3.05644 | 0.71304  |
| C | 3.06917  | -1.20659 | 1.07941  |
| S | 1.75561  | -0.01711 | 1.38604  |
| H | 5.82714  | -3.81762 | 0.53390  |
| C | 3.88060  | -3.04485 | -0.03926 |
| S | 1.53646  | -0.20715 | -1.66909 |
| N | 2.88841  | -2.14656 | 0.13861  |
| H | 2.57023  | 1.11752  | -3.95467 |
| C | 0.72203  | -0.23244 | -0.06253 |
| H | 3.70442  | -3.79407 | -0.82102 |

**K(C<sub>5</sub>H<sub>4</sub>N-S)**

BP86 energy = -557.881036737  
Enthalpy 0K = -557.678612  
Enthalpy 298K = -557.661749  
Free energy 298K = -557.726902  
Low freq. = 11.8273 cm<sup>-1</sup>

|   |          |          |          |
|---|----------|----------|----------|
| K | -0.53014 | -0.70696 | -1.17921 |
| S | 1.24020  | 1.73640  | -0.89067 |
| H | 5.53491  | 0.24907  | 1.02115  |
| C | 4.54082  | -0.05255 | 0.67065  |
| H | 4.81618  | -2.19390 | 1.07483  |
| C | 4.15106  | -1.40878 | 0.70433  |
| C | 2.87010  | -1.71569 | 0.24123  |
| C | 3.65266  | 0.90298  | 0.18735  |
| H | 2.52025  | -2.75877 | 0.24771  |
| H | 3.92179  | 1.96180  | 0.14602  |
| N | 1.98518  | -0.80805 | -0.23416 |
| C | 2.35510  | 0.51837  | -0.27303 |
| C | -3.70679 | -1.48447 | -0.23129 |
| C | -3.86183 | -0.23399 | -0.85937 |
| C | -3.28837 | 0.91871  | -0.29363 |
| C | -2.97964 | -1.56411 | 0.97112  |
| C | -2.54872 | 0.85575  | 0.91057  |
| C | -2.40967 | -0.40684 | 1.53216  |
| H | -4.44616 | -0.15266 | -1.78274 |
| H | -4.17066 | -2.37995 | -0.65834 |
| H | -2.86999 | -2.52628 | 1.48358  |
| H | -3.41862 | 1.88818  | -0.78792 |
| H | -1.84965 | -0.47910 | 2.47147  |
| C | -1.87893 | 2.08480  | 1.47779  |
| H | -2.46174 | 2.99600  | 1.26529  |
| H | -0.87627 | 2.21354  | 1.01820  |
| H | -1.74155 | 2.00334  | 2.56821  |
